# Supplementary material
Source: publisher figshare collection journal article supplement (https://asha.figshare.com/ndownloader/files/38093718)
Supplement: Supplementary file 1 [file 38093718]

**Supplemental Material S1.** Effect size of changes from intervention as measured by each scoring approaches (with nonparametric Wilcoxon signed-rank test).

|                                                                      | PLS-5 AC   |            |            |             | PLS-5 EC   |            |            |             |
|----------------------------------------------------------------------|------------|------------|------------|-------------|------------|------------|------------|-------------|
| Changes during intervention (T1 minus T0 scores)                     |            |            |            |             |            |            |            |             |
|                                                                      | RS         | AE         | GSV        | SS          | RS         | AE         | GSV        | SS          |
| <i>r</i>                                                             | 0.62       | 0.62       | 0.61       | 0.22        | 0.57       | 0.55       | 0.58       | 0.04        |
| 95% CI                                                               | [.48, .72] | [.49, .73] | [.47, .72] | [.03, .41]  | [.41, .71] | [.39, .70] | [.43, .71] | [.003, .26] |
| <i>p</i>                                                             | < .001**   | < .001**   | < .001**   | .047*       | < .001**   | < .001**   | < .001**   | .82         |
| Changes during 3-month post intervention period (T2 minus T1 scores) |            |            |            |             |            |            |            |             |
| <i>r</i>                                                             | 0.52       | 0.51       | 0.51       | 0.04        | 0.4        | 0.41       | 0.4        | 0.23        |
| 95% CI                                                               | [.34, .66] | [.34, .65] | [.34, .66] | [.003, .27] | [.21, .57] | [.22, .57] | [.21, .57] | [.04, .43]  |
| <i>p</i>                                                             | < .001**   | < .001**   | < .001**   | .48         | < .001**   | < .001**   | < .001**   | .04*        |

*Note.* AC = auditory comprehension scale; EC = expressive communication scale; RS = raw score; AE = age equivalents; GSV = growth scale values; SS = standard scores; *r* = effect size from Wilcoxon signed-rank test ( $z/\sqrt{N}$ ).

\*\**p* < .001. \**p* < .05.
